# Supplementary material for: Smoking is associated with worse outcomes of COVID-19 particularly among younger adults: a systematic review and meta-analysis
Source: Springer Nature journal article supplement (doi:10.1186/s12889-021-11579-x), 2021-08-16
Supplement: MOESM1 [file 19574050]

# **Smoking is associated with worse outcomes of COVID-19 particularly among younger adults: A systematic review and meta-analysis**

## **ADDITIONAL FILE**

Roengrudee Patanavanich MD LLM PhD  
Stanton A. Glantz PhD

### **Risk of Bias Assessment**

We evaluated the quality of studies using a modification of the ACROBAT-NRSI[7] tool on 5 domains: study population, exposure measurement, outcome assessment, measurement of confounders, and adequate follow-up. Each one of these domains was scored 0 for low risk of bias, 1 for moderate risk of bias, and 2 for high risk of bias and the average score of each study was computed and discussed among both authors. Studies with the average score higher than 1 were considered high risk and excluded in a sensitivity analysis.

#### **Study population**

- Low risk: studies included at least 50 patients
- Moderate risk: studies included at least 20 patients
- High risk: studies included less than 20 patients

#### **Exposure measurement**

- Low risk: studies reported 3 categories of smoking status: current, former, and never smokers
- Moderate risk: studies reported 2 categories of smoking status
- High risk: studies reported only 1 category of smoking status

#### **Outcome assessment**

- Low risk: studies reported a clear definition of outcomes
- High risk: studies did not report specific outcomes

#### **Measurement of confounders**

- Low risk: adjustment for confounders
- High risk: unadjusted analyses

#### **Adequate follow-up**

- Low risk: identify duration of data collection
- High risk: duration of data collection is unclear

### **References**

References are the same as cited in the main text.

| Table A1 Summary of Studies     |                                                                           |               |                         |                                                                                   |                                                                                                                                           |                           |                                                                                                         |          |            |                                                                     |                                                                     |                                                                     |                    |
|---------------------------------|---------------------------------------------------------------------------|---------------|-------------------------|-----------------------------------------------------------------------------------|-------------------------------------------------------------------------------------------------------------------------------------------|---------------------------|---------------------------------------------------------------------------------------------------------|----------|------------|---------------------------------------------------------------------|---------------------------------------------------------------------|---------------------------------------------------------------------|--------------------|
| Author                          | Setting                                                                   | Study type    | Time of data collection | Population                                                                        | Definition of disease progression                                                                                                         | Smoking status            | Odds of disease progression (95%CI)                                                                     |          | Adjustment | Smoking prevalence                                                  |                                                                     |                                                                     | Patients' mean age |
|                                 |                                                                           |               |                         |                                                                                   |                                                                                                                                           |                           | Unadjusted                                                                                              | Adjusted |            | Overall                                                             | More severe group                                                   | Less severe group                                                   |                    |
| Beyrouti et al [8]              | UK National Hospital for Neurology and Neurosurgery, Queen Square, London | Case series   | 1 Apr 2020-16 Apr 2020  | 6 confirmed COVID-19 patients with acute ischemic stroke                          | ICU admission                                                                                                                             | Smoking                   | 0.47 (0.01, 16.89)                                                                                      | N/A      | N/A        | 16.7%                                                               | N/A                                                                 | 25.0%                                                               | 70                 |
| Buckner et al [9]               | US University of Washington affiliated hospitals                          | Retrospective | 2 Mar 2020-26 Mar 2020  | 105 hospitalized patients with laboratory confirmed COVID-19                      | A composite endpoint of admission to an intensive care unit (ICU) or death                                                                | Smoking (ever)            | 0.89 (0.34, 2.35)                                                                                       | N/A      | N/A        | 25.6%                                                               | 24.4%                                                               | 26.7%                                                               | 69                 |
| CDC COVID-19 Response Team [10] | US                                                                        | Retrospective | 12 Feb 2020-28 Mar 2020 | 7,162 confirmed COVID-19 patients with completed information*                     | ICU admission                                                                                                                             | Current and former smoker | Current smoker: 0.86 (0.35-2.13)<br>Former smoker: 3.76 (2.53-5.59)<br>Current/former: 2.60 (1.82-3.73) | N/A      | N/A        | Current smoker: 1.3%<br>Former smoker: 2.3%<br>Current/former: 3.6% | Current smoker: 0.5%<br>Former smoker: 3.1%<br>Current/former: 3.6% | Current smoker: 1.3%<br>Former smoker: 2.0%<br>Current/former: 3.4% | N/A                |
| Chen Q et al [11]               | China Taizhou Public Health Medical Center, Zhejiang                      | Retrospective | 1 Jan 2020- 11 Mar 2020 | 145 hospitalized patients with laboratory confirmed COVID-19                      | Respiratory distress with respiratory rate $\geq 30$ /min, or oxygen saturation $\leq 93\%$ at rest, or oxygenation index $\leq 300$ mmHg | Smoking history           | 0.56 (0.15-2.10)                                                                                        | N/A      | N/A        | 10.3%                                                               | 7.0%                                                                | 11.8%                                                               | 48                 |
| Chen T et al [12]               | China Tongji Hospital                                                     | Retrospective | 13 Jan 2020-13 Feb 2020 | 799 moderately to severely ill or critically ill patients with confirmed covid-19 | Death                                                                                                                                     | Current and former smoker | Current smoker: 2.03 (0.63-6.58)<br>Former smoker: 0.58 (0.11-3.05)<br>Current/former: 1.31 (0.51-3.33) | N/A      | N/A        | Current smoker: 4.4%<br>Former smoker: 2.6%<br>Current/former: 6.9% | Current smoker: 6.2%<br>Former smoker: 1.8%<br>Current/former: 8.0% | Current smoker: 3.1%<br>Former smoker: 3.1%<br>Current/former: 6.2% | 62                 |

| Table A1 Summary of Studies |                                                                                                                                  |                    |                          |                                                                                   |                                                                                                                                                                                                                    |                    |                                     |          |            |                    |                   |                   |                    |
|-----------------------------|----------------------------------------------------------------------------------------------------------------------------------|--------------------|--------------------------|-----------------------------------------------------------------------------------|--------------------------------------------------------------------------------------------------------------------------------------------------------------------------------------------------------------------|--------------------|-------------------------------------|----------|------------|--------------------|-------------------|-------------------|--------------------|
| Author                      | Setting                                                                                                                          | Study type         | Time of data collection  | Population                                                                        | Definition of disease progression                                                                                                                                                                                  | Smoking status     | Odds of disease progression (95%CI) |          | Adjustment | Smoking prevalence |                   |                   | Patients' mean age |
|                             |                                                                                                                                  |                    |                          |                                                                                   |                                                                                                                                                                                                                    |                    | Unadjusted                          | Adjusted |            | Overall            | More severe group | Less severe group |                    |
| Dong et al [13]             | China Zhongnan Hospital of Wuhan University, No. 7 hospital of Wuhan, and Wuhan Children's Hospital                              | Case series        | 20 Jan 2020-3 Mar 2020   | 9 adults hospitalized patients with laboratory confirmed COVID-19**               | Bilateral pneumonia, respiratory distress, required mechanical ventilation, ICU care, or hospitalized > 10 days.                                                                                                   | Current smoker     | 1.15 (0.03-38.88)                   | N/A      | N/A        | 11.1%              | 14.3%             | 0.0%              | 44                 |
| Feng et al [14]             | Jinyintan Hospital in Wuhan, Shanghai Public Health Clinical Center in Shanghai and Tongling People's Hospital in Anhui Province | Retrospective      | 1 Jan 2020-15 Feb 2020   | 476 hospitalized patients with laboratory confirmed COVID-19                      | Severe (respiratory distress with respiratory rate $\geq 30$ /min, or oxygen saturation $\leq 93\%$ at rest, or oxygenation index $\leq 300$ mmHg), or critical (respiratory failure, shock, or organ dysfunction) | Smoking            | 1.85 (0.97-3.54)                    | N/A      | N/A        | 9.7%               | 14.0%             | 8.1%              | 53                 |
| Gayam et al [15]            | Interfaith Medical Center, Brooklyn, New York                                                                                    | Case series        | 1 Mar 2020-15 April 2020 | 6 confirmed hospitalized COVID-19 patients coinfecting with Mycoplasma pneumoniae | Required intensive mechanical ventilator                                                                                                                                                                           | Current smoker     | 0.47 (0.01-16.89)                   | N/A      | N/A        | 33.3%              | 0.0%              | 40.0%             | 57                 |
| Giacomelliet al [16]        | Infectious Diseases and Intensive Care units of Luigi Sacco Hospital, Milan                                                      | Prospective cohort | 21 Feb 2020-19 Mar 2020  | 233 hospitalized patients with laboratory confirmed COVID-19                      | Death                                                                                                                                                                                                              | History of smoking | 1.37 (0.70-2.68)                    | N/A      | N/A        | 30.0%              | 35.4%             | 28.6%             | 61                 |

| Table A1 Summary of Studies |                                                                                                                       |               |                         |                                                                                      |                                                            |                           |                                                                                                          |          |            |                                                                       |                                                                           |                                                                           |                    |
|-----------------------------|-----------------------------------------------------------------------------------------------------------------------|---------------|-------------------------|--------------------------------------------------------------------------------------|------------------------------------------------------------|---------------------------|----------------------------------------------------------------------------------------------------------|----------|------------|-----------------------------------------------------------------------|---------------------------------------------------------------------------|---------------------------------------------------------------------------|--------------------|
| Author                      | Setting                                                                                                               | Study type    | Time of data collection | Population                                                                           | Definition of disease progression                          | Smoking status            | Odds of disease progression (95%CI)                                                                      |          | Adjustment | Smoking prevalence                                                    |                                                                           |                                                                           | Patients' mean age |
|                             |                                                                                                                       |               |                         |                                                                                      |                                                            |                           | Unadjusted                                                                                               | Adjusted |            | Overall                                                               | More severe group                                                         | Less severe group                                                         |                    |
| Goyal et al [17]            | US 862-bed quaternary referral center and an affiliated 180-bed nonteaching community hospital in Manhattan, New York | Retrospective | 3 Mar 2020-27 Mar 2020  | 393 hospitalized patients with COVID-19 diagnosis                                    | Required intensive mechanical ventilator                   | Current smoker            | 0.86 (0.32-2.29)                                                                                         | N/A      | N/A        | 5.1%                                                                  | 4.6%                                                                      | 5.3%                                                                      | 62                 |
| Guan et al [18]             | 552 hospitals in 30 provinces, autonomous regions, and municipalities                                                 | Retrospective | 11 Dec 2019-29 Jan 2020 | 1,099 patients (both hospitalized and outpatient) with laboratory confirmed COVID-19 | ICU admission, the use of mechanical ventilation, or death | Current, former and never | Current smoker: 2.84 (1.57-5.14)<br>Former smoker: 6.27 (2.20-17.90)<br>Current/former: 3.25 (1.89-5.59) | N/A      | N/A        | Current smoker: 12.6%<br>Former smoker: 1.9%<br>Current/former: 14.6% | Current smoker : 25.8%<br>Former smoker : 7.6%<br>Current /former : 33.3% | Current smoker : 11.8%<br>Former smoker : 1.6%<br>Current /former : 13.3% | 47                 |
| Guo et al [19]              | Seventh Hospital of Wuhan City                                                                                        | Retrospective | 23 Jan 2020-23 Feb 2020 | 187 hospitalized patients with laboratory confirmed COVID-19                         | Acute myocardial injury                                    | Smoking                   | 1.75 (0.64-4.80)                                                                                         | N/A      | N/A        | 9.6%                                                                  | 13.5%                                                                     | 8.1%                                                                      | 59                 |

| Author             | Setting                                                         | Study type    | Time of data collection  | Population                                                   | Definition of disease progression                                                                                                                                                                                                                                                                                                                                                                                                                                                              | Smoking status  | Odds of disease progression (95%CI) |                   | Adjustment                                                                                                                | Smoking prevalence |                   |                   | Patients' mean age |
|--------------------|-----------------------------------------------------------------|---------------|--------------------------|--------------------------------------------------------------|------------------------------------------------------------------------------------------------------------------------------------------------------------------------------------------------------------------------------------------------------------------------------------------------------------------------------------------------------------------------------------------------------------------------------------------------------------------------------------------------|-----------------|-------------------------------------|-------------------|---------------------------------------------------------------------------------------------------------------------------|--------------------|-------------------|-------------------|--------------------|
|                    |                                                                 |               |                          |                                                              |                                                                                                                                                                                                                                                                                                                                                                                                                                                                                                |                 | Unadjusted                          | Adjusted          |                                                                                                                           | Overall            | More severe group | Less severe group |                    |
| Hu et al [20]      | China<br>Tianyou Hospital in Wuhan                              | Retrospective | 8 Jan 2020- 20 Feb 2020  | 323 hospitalized patients with COVID-19 diagnosis            | Death, progression from non-severe to severe (patients showed features of nonsevere patients plus respiratory distress with RR $\geq 30$ breaths/min, oxygen saturation $\leq 93\%$ , arterial partial pressure of oxygen/oxygen concentration $\leq 300$ mmHg) or critical (patients showed respiratory failure requiring ventilatory support, as well as shock and organ dysfunction requiring intensive care) or severe to critical status, and/or maintenance of severe or critical status | Smoking history | 2.12 (1.00-4.47)                    | 3.46 (1.18-10.17) | Age, hypnotics, diagnosis at critical status, diabetes, hypertensive troponin I, white blood cell count, neutrophil count | 11.8%              | 15.1%             | 7.9%              | 61                 |
| Huang C et al [21] | China<br>Jin Yin-tan Hospital in Wuhan                          | Retrospective | 16 Dec 2019-2 Jan 2020   | 41 hospitalized patients with laboratory confirmed COVID-19  | ICU admission                                                                                                                                                                                                                                                                                                                                                                                                                                                                                  | Current smoking | 0.27 (0.01-5.62)                    | N/A               | N/A                                                                                                                       | 7.3%               | 0.0%              | 10.7%             | 49                 |
| Huang R et al [22] | China<br>8 designated hospitals in 8 cities of Jiangsu Province | Retrospective | 22 Jan 2020- 10 Feb 2020 | 202 hospitalized patients with laboratory confirmed COVID-19 | Severe (respiratory distress with respiratory rate $\geq 30$ /min, or oxygen saturation $\leq 93\%$ at rest, or oxygenation index $\leq 300$ mmHg), or critical (respiratory failure, shock, or organ dysfunction)                                                                                                                                                                                                                                                                             | Smoking history | 1.12 (0.24, 5.22)                   | N/A               | N/A                                                                                                                       | 7.9%               | 8.7%              | 7.8%              | 44                 |

| Table A1 Summary of Studies |                                                                                                       |               |                          |                                                                |                                                                                                                                                                                                   |                       |                                                                   |                                                             |                                                                                                                                                                  |                                             |                                             |                                             |                                       |
|-----------------------------|-------------------------------------------------------------------------------------------------------|---------------|--------------------------|----------------------------------------------------------------|---------------------------------------------------------------------------------------------------------------------------------------------------------------------------------------------------|-----------------------|-------------------------------------------------------------------|-------------------------------------------------------------|------------------------------------------------------------------------------------------------------------------------------------------------------------------|---------------------------------------------|---------------------------------------------|---------------------------------------------|---------------------------------------|
| Author                      | Setting                                                                                               | Study type    | Time of data collection  | Population                                                     | Definition of disease progression                                                                                                                                                                 | Smoking status        | Odds of disease progression (95%CI)                               |                                                             | Adjustment                                                                                                                                                       | Smoking prevalence                          |                                             |                                             | Patients' mean age                    |
|                             |                                                                                                       |               |                          |                                                                |                                                                                                                                                                                                   |                       | Unadjusted                                                        | Adjusted                                                    |                                                                                                                                                                  | Overall                                     | More severe group                           | Less severe group                           |                                       |
| Hur et al [23]              | US<br>10 hospitals in the Chicago metropolitan area                                                   | Retrospective | 1 Mar 2020- 8 April 2020 | 486 hospitalized patients with laboratory confirmed COVID-19   | Intubation and prolonged intubation for acute respiratory failure                                                                                                                                 | Current/former smoker | 1.47 (0.98-2.22)                                                  | N/A                                                         | N/A                                                                                                                                                              | 33.5%                                       | 39.9%                                       | 31.0%                                       | 59                                    |
| Ji et al [24]               | China<br>Fuyang Second People's Hospital and the Fifth Medical Center of Chinese PLA General Hospital | Retrospective | 20 Jan 2020-22 Feb 2020  | 208 hospitalized patients with laboratory confirmed COVID-19   | Progression to respiratory distress with respiratory rate $\geq 30$ /min, or oxygen saturation $\leq 93\%$ at rest, or oxygenation index $\leq 300$ mmHg, or requirement of mechanical ventilator | Smoke                 | 2.10 (0.75-5.93)                                                  | N/A                                                         | N/A                                                                                                                                                              | 9.1%                                        | 15.0%                                       | 7.7%                                        | 44                                    |
| Kim et al [25]              | Korea                                                                                                 | Retrospective | 19 Jan 2020-17 Feb 2020  | 28 confirmed COVID-10 cases nationwide                         | Required oxygen supplement                                                                                                                                                                        | Smoking               | 2.25 (0.30-16.85)                                                 | N/A                                                         | N/A                                                                                                                                                              | 21.4%                                       | 33.3%                                       | 18.2%                                       | 43                                    |
| Klang et al [26]            | US<br>5 hospital campuses of the Mount Sinai hospital, New York                                       | Retrospective | 1 Mar 2020- 17 May 2020  | 3,406 hospitalized patients with laboratory confirmed COVID-19 | Death                                                                                                                                                                                             | Smoking               | age $\leq 50$ : 1.97 (1.01-3.85)<br>age $> 50$ : 1.13 (0.95-1.35) | age $\leq 50$ : 1.7 (0.8-1.2)<br>age $> 50$ : 1.0 (0.8-1.2) | Age, sex, coronary arterial disease, congestive heart failure, hypertension, diabetes, hyperlipidemia, chronic kidney disease, cancer, intubation, BMI, and race | age $\leq 50$ : 13.3%<br>age $> 50$ : 25.3% | age $\leq 50$ : 21.7%<br>age $> 50$ : 26.8% | age $\leq 50$ : 12.3%<br>age $> 50$ : 24.4% | age $\leq 50$ : 41<br>age $> 50$ : 71 |

| Table A1 Summary of Studies |                                                                                                                                                 |               |                          |                                                                |                                                                                                                                                                                                                                                                             |                           |                                                                                                         |          |            |                                                                      |                                                                           |                                                                          |                    |
|-----------------------------|-------------------------------------------------------------------------------------------------------------------------------------------------|---------------|--------------------------|----------------------------------------------------------------|-----------------------------------------------------------------------------------------------------------------------------------------------------------------------------------------------------------------------------------------------------------------------------|---------------------------|---------------------------------------------------------------------------------------------------------|----------|------------|----------------------------------------------------------------------|---------------------------------------------------------------------------|--------------------------------------------------------------------------|--------------------|
| Author                      | Setting                                                                                                                                         | Study type    | Time of data collection  | Population                                                     | Definition of disease progression                                                                                                                                                                                                                                           | Smoking status            | Odds of disease progression (95%CI)                                                                     |          | Adjustment | Smoking prevalence                                                   |                                                                           |                                                                          | Patients' mean age |
|                             |                                                                                                                                                 |               |                          |                                                                |                                                                                                                                                                                                                                                                             |                           | Unadjusted                                                                                              | Adjusted |            | Overall                                                              | More severe group                                                         | Less severe group                                                        |                    |
| Li X et al[27]              | China Tongji Hospital                                                                                                                           | Retrospective | 26 Jan 2020-5 Feb 2020   | 548 hospitalized patients with laboratory confirmed COVID-19   | Respiratory distress with respiratory rate $\geq 30$ /min, or breaths per minute, PaO <sub>2</sub> /FIO <sub>2</sub> ratio lower than 250, multilobar infiltrates confusion, or disorientation, or respiratory failure, or required mechanical ventilation, or septic shock | Current, former and never | Current smoker: 0.87 (0.46-1.66)<br>Former smoker: 2.04 (1.12-3.73)<br>Current/former: 1.38 (0.88-2.17) | N/A      | N/A        | Current smoker: 7.5%<br>Former smoker: 9.4%<br>Current/former: 16.9% | Current smoker : 6.8%<br>Former smoker : 12.5%<br>Current /former : 19.2% | Current smoker : 8.2%<br>Former smoker : 6.5%<br>Current /former : 14.7% | 60                 |
| Li YK et al[28]             | China Department of Thoracic Surgery of Tongji Hospital affiliated with Tongji Medical College of Huazhong University of Science and Technology | Retrospective | 1 Jan 2020- 20 Feb 2020  | 25 hospitalized patients with laboratory confirmed COVID-19    | Severe (respiratory distress with respiratory rate $\geq 30$ /min, or oxygen saturation $\leq 93\%$ at rest, or oxygenation index $\leq 300$ mmHg), or critical (respiratory failure, shock, or organ dysfunction)                                                          | Smoking                   | 8.75 (1.21-63.43)                                                                                       | N/A      | N/A        | 28.0%                                                                | 55.6%                                                                     | 12.5%                                                                    | 51                 |
| Liang et al [29]            | China 575 hospitals in 31 provincial administrative regions                                                                                     | Retrospective | 21 Nov 2019- 31 Jan 2020 | 1,590 hospitalized patients with laboratory confirmed COVID-19 | Admission to the intensive care unit (ICU), invasive ventilation, or death                                                                                                                                                                                                  | Current/former and never  | 2.34 (1.36-4.02)                                                                                        | N/A      | N/A        | 7.0%                                                                 | 13.7%                                                                     | 6.4%                                                                     | 49                 |

| Table A1 Summary of Studies |                                                                                                 |               |                         |                                                                                                                             |                                                                                                   |                    |                                     |                   |                                                                                                                                              |                    |                   |                   |                    |
|-----------------------------|-------------------------------------------------------------------------------------------------|---------------|-------------------------|-----------------------------------------------------------------------------------------------------------------------------|---------------------------------------------------------------------------------------------------|--------------------|-------------------------------------|-------------------|----------------------------------------------------------------------------------------------------------------------------------------------|--------------------|-------------------|-------------------|--------------------|
| Author                      | Setting                                                                                         | Study type    | Time of data collection | Population                                                                                                                  | Definition of disease progression                                                                 | Smoking status     | Odds of disease progression (95%CI) |                   | Adjustment                                                                                                                                   | Smoking prevalence |                   |                   | Patients' mean age |
|                             |                                                                                                 |               |                         |                                                                                                                             |                                                                                                   |                    | Unadjusted                          | Adjusted          |                                                                                                                                              | Overall            | More severe group | Less severe group |                    |
| Liu et al [30]              | China<br>Three tertiary hospitals in Wuhan                                                      | Retrospective | 30 Dec 2019-15 Jan 2020 | 78 hospitalized patients with laboratory confirmed COVID-19                                                                 | Respiratory distress, respiratory failure, required mechanical ventilation and ICU care, or death | History of smoking | 12.19 (1.76-84.31)                  | 14.29 (1.58-25.0) | Age, maximum temperature at admission, respiratory failure, severe illness, albumin, creatinine, procalcitonin, and C-reactive protein level | 6.4%               | 27.3%             | 3.0%              | 38                 |
|                             |                                                                                                 |               |                         |                                                                                                                             |                                                                                                   |                    |                                     |                   |                                                                                                                                              |                    |                   |                   |                    |
| Mo et al [32]               | China<br>Zhongnan hospital of Wuhan University                                                  | Retrospective | 1 Jan 2020-5 Feb 2020   | 155 hospitalized patients with laboratory confirmed COVID-19                                                                | Did not improve after treatment, status changed to severe, or hospitalized > 10 days              | Current smoking    | 1.68 (0.30-9.45)                    | N/A               | N/A                                                                                                                                          | 3.9%               | 4.7%              | 2.9%              | 54                 |
| Morassi et al [33]          | Italy<br>Fondazione Poliambulanza Hospital, Brescia, Italy and Udine University Hospital, Udine | Case series   | 16 Mar 2020- 5 Apr 2020 | 6 hospitalized patients with laboratory confirmed COVID-19 who developed clinical and neuroimaging evidence of acute stroke | Death                                                                                             | Smoker             | 1.00 (0.03-40.28)                   | N/A               | N/A                                                                                                                                          | 16.7%              | 20.0%             | 0.0%              | 69                 |



| Table A1 Summary of Studies |                                                                                                            |                    |                          |                                                              |                                                                                                                                           |                           |                                                                                                                            |                                                                                                                           |                                                                                                                                                                        |                                                                       |                                                                           |                                                                           |                    |
|-----------------------------|------------------------------------------------------------------------------------------------------------|--------------------|--------------------------|--------------------------------------------------------------|-------------------------------------------------------------------------------------------------------------------------------------------|---------------------------|----------------------------------------------------------------------------------------------------------------------------|---------------------------------------------------------------------------------------------------------------------------|------------------------------------------------------------------------------------------------------------------------------------------------------------------------|-----------------------------------------------------------------------|---------------------------------------------------------------------------|---------------------------------------------------------------------------|--------------------|
| Author                      | Setting                                                                                                    | Study type         | Time of data collection  | Population                                                   | Definition of disease progression                                                                                                         | Smoking status            | Odds of disease progression (95%CI)                                                                                        |                                                                                                                           | Adjustment                                                                                                                                                             | Smoking prevalence                                                    |                                                                           |                                                                           | Patients' mean age |
|                             |                                                                                                            |                    |                          |                                                              |                                                                                                                                           |                           | Unadjusted                                                                                                                 | Adjusted                                                                                                                  |                                                                                                                                                                        | Overall                                                               | More severe group                                                         | Less severe group                                                         |                    |
| Palaiodimos et al [34]      | US Montefiore Medical Center, Bronx, New York                                                              | Retrospective      | 9 Mar 2020- 22 Mar 2020  | 200 hospitalized patients with laboratory confirmed COVID-19 | Increasing oxygen requirement***<br>Intubation<br>In-hospital mortality                                                                   | Current/former smoker     | Increasing oxygen requirement: 1.86 (1.02-3.39)<br>Intubation: 1.56 (0.77-3.15)<br>In-hospital mortality: 1.19 (0.60-2.36) | Increasing oxygen requirement: 2.1 (1.07-4.1)<br>Intubation : 1.66 (0.76-3.62)<br>In-hospital mortality: 0.83 (0.37-1.87) | N/A                                                                                                                                                                    | 32.5%                                                                 | N/A                                                                       | N/A                                                                       | 64                 |
| Petrilli et al [35]         | US NYU Langone Health with more than 260 outpatient office sites and four acute care hospitals in New York | Prospective cohort | 1 Mar 2020- 8 Apr 2020   | 5,279 patients with laboratory confirmed COVID-19            | Admission to intensive care unit, use of mechanical ventilation, discharge to hospice, or death                                           | Current, former and never | Current smoker: 0.94 (0.65-1.36)<br>Former smoker: 1.49 (1.22-1.82)<br>Current/former: 1.37 (1.14-1.65)                    | Current smoker: 0.77 (0.52-1.20)<br>Former smoker: 1.06 (0.85-1.30)                                                       | Age, sex, race, BMI, coronary arterial disease, heart failure, hyperlipidemia, hypertension, diabetes, asthma, COPD, chronic kidney disease, cancer, week of admission | Current smoker: 5.2%<br>Former smoker: 20.6%<br>Current/former: 25.7% | Current smoker : 4.4%<br>Former smoker : 23.8%<br>Current /former : 28.3% | Current smoker : 5.6%<br>Former smoker : 18.7%<br>Current /former : 24.3% | 63                 |
| Qin et al [36]              | China Tongji Hospital                                                                                      | Retrospective      | 10 Jan 2020- 12 Feb 2020 | 452 hospitalized patients with laboratory confirmed COVID-19 | Respiratory distress with respiratory rate $\geq 30$ /min, or oxygen saturation $\leq 93\%$ at rest, or oxygenation index $\leq 300$ mmHg | Smoking                   | 0.43 (0.10-1.94)                                                                                                           | N/A                                                                                                                       | N/A                                                                                                                                                                    | 1.5%                                                                  | 1.0%                                                                      | 2.4%                                                                      | 58                 |

| Table A1 Summary of Studies |                                                                          |               |                          |                                                                                            |                                                                                                                                                                                                                    |                           |                                                                                                            |          |            |                                                                       |                                                                 |                                                                       |                    |
|-----------------------------|--------------------------------------------------------------------------|---------------|--------------------------|--------------------------------------------------------------------------------------------|--------------------------------------------------------------------------------------------------------------------------------------------------------------------------------------------------------------------|---------------------------|------------------------------------------------------------------------------------------------------------|----------|------------|-----------------------------------------------------------------------|-----------------------------------------------------------------|-----------------------------------------------------------------------|--------------------|
| Author                      | Setting                                                                  | Study type    | Time of data collection  | Population                                                                                 | Definition of disease progression                                                                                                                                                                                  | Smoking status            | Odds of disease progression (95%CI)                                                                        |          | Adjustment | Smoking prevalence                                                    |                                                                 |                                                                       | Patients' mean age |
|                             |                                                                          |               |                          |                                                                                            |                                                                                                                                                                                                                    |                           | Unadjusted                                                                                                 | Adjusted |            | Overall                                                               | More severe group                                               | Less severe group                                                     |                    |
| Rastrelli et al [37]        | Italy Carlo Poma Hospital in Mantua                                      | Case series   | No information           | 31 male patients with laboratory confirmed COVID-19 in the respiratory intensive care unit | Transferred to ICU for intubation, or death                                                                                                                                                                        | Current and former smoker | Current smoker: 2.33 (0.07-74.55)<br>Former smoker: 1.89 (0.23-15.74)<br>Current/former: 1.70 (0.21-14.02) | N/A      | N/A        | Current smoker: 3.2%<br>Former smoker: 35.5%<br>Current/former: 38.7% | Current smoker: 0%<br>Former smoker: 50%<br>Current/former: 50% | Current smoker: 4.8%<br>Former smoker: 42.9%<br>Current/former: 47.7% | 65                 |
| Ren et al [38]              | Third People's Hospital of Shenzhen                                      | Retrospective | 11 Jan 2020- 12 Feb 2020 | 150 hospitalized patients with laboratory confirmed COVID-19                               | Development of sepsis                                                                                                                                                                                              | Smoking history           | 15.28 (0.77-301.86)                                                                                        | N/A      | N/A        | 2.0%                                                                  | 6.1%                                                            | 0.0%                                                                  | 54                 |
| Shi et al [39]              | China Zhejiang Province                                                  | Retrospective | Up to 02/17/2020         | 487 hospitalized patients with laboratory confirmed COVID-19                               | Severe disease (without precisely defining it) or death                                                                                                                                                            | Smoking history           | 1.61 (0.64-4.04)                                                                                           | N/A      | N/A        | 8.2%                                                                  | 12.2%                                                           | 7.8%                                                                  | 46                 |
| Wan et al [40]              | China Chongqing University Three Gorges hospital, in northeast Chongqing | Retrospective | 23 Jan 2020-8 Feb 2020   | 135 hospitalized patients with laboratory confirmed COVID-19                               | Respiratory distress with respiratory rate $\geq 30$ /min, or oxygen saturation $\leq 93\%$ at rest, or oxygenation index $\leq 300$ mmHg                                                                          | Current smoking           | 0.28 (0.03-2.31)                                                                                           | N/A      | N/A        | 6.7%                                                                  | 2.5%                                                            | 8.4%                                                                  | 47                 |
| Wang et al [41]             | NO.2 People's Hospital of Fuyang City                                    | Retrospective | 20 Jan 2020-9 Feb 2020   | 125 hospitalized patients with laboratory confirmed COVID-19                               | Severe (respiratory distress with respiratory rate $\geq 30$ /min, or oxygen saturation $\leq 93\%$ at rest, or oxygenation index $\leq 300$ mmHg), or critical (respiratory failure, shock, or organ dysfunction) | Current smoking           | 3.93 (1.30-11.93)                                                                                          | N/A      | N/A        | 12.8%                                                                 | 28.0%                                                           | 9.0%                                                                  | 39                 |

| Table A1 Summary of Studies |                                                                                                                                             |               |                                |                                                                                                                                  |                                                                                                                                                                                                                    |                |                                     |          |            |                    |                   |                   |                    |
|-----------------------------|---------------------------------------------------------------------------------------------------------------------------------------------|---------------|--------------------------------|----------------------------------------------------------------------------------------------------------------------------------|--------------------------------------------------------------------------------------------------------------------------------------------------------------------------------------------------------------------|----------------|-------------------------------------|----------|------------|--------------------|-------------------|-------------------|--------------------|
| Author                      | Setting                                                                                                                                     | Study type    | Time of data collection        | Population                                                                                                                       | Definition of disease progression                                                                                                                                                                                  | Smoking status | Odds of disease progression (95%CI) |          | Adjustment | Smoking prevalence |                   |                   | Patients' mean age |
|                             |                                                                                                                                             |               |                                |                                                                                                                                  |                                                                                                                                                                                                                    |                | Unadjusted                          | Adjusted |            | Overall            | More severe group | Less severe group |                    |
| Xiong et al [42]            | China<br>Wuhan<br>Hemodialysis<br>Quality<br>Control<br>Center                                                                              | Retrospective | 1 Jan<br>2020- 10<br>Mar 2020  | 131 hospitalized patients with laboratory confirmed COVID-19 who received maintenance hemodialysis at 65 centers in Wuhan, China | Severe (respiratory distress with respiratory rate $\geq 30$ /min, or oxygen saturation $\leq 93\%$ at rest, or oxygenation index $\leq 300$ mmHg), or critical (respiratory failure, shock, or organ dysfunction) | Current smoker | 0.66 (0.26-1.69)                    | N/A      | N/A        | 29.8%              | 23.3%             | 31.7%             | 63                 |
| Xu et al [43]               | China<br>First<br>Affiliated<br>Hospital,<br>School of<br>Medicine,<br>Zhejiang<br>University and<br>Shenzhen<br>Third People's<br>Hospital | Retrospective | 13 Jan<br>2020- 19<br>Feb 2020 | 113 hospitalized patients with laboratory confirmed COVID-19                                                                     | Prolonged viral RNA shedding                                                                                                                                                                                       | Current smoker | 0.80 (0.18-3.54)                    | N/A      | N/A        | 7.1%               | 6.6%              | 8.1%              | 52                 |
| Yan et al [44]              | China<br>No.3 People's<br>Hospital of<br>Hubei<br>Province                                                                                  | Retrospective | 31 Jan<br>2020- 9<br>Mar 2020  | 168 hospitalized patients with laboratory confirmed COVID-19                                                                     | Prolonged viral RNA shedding                                                                                                                                                                                       | Current smoker | 0.86 (0.23-3.18)                    | N/A      | N/A        | 10.0%              | 11.9%             | 8.2%              | 52                 |
| Yang et al [45]             | China<br>Wuhan Jin<br>Yin-tan<br>Hospital,<br>Wuhan                                                                                         | Retrospective | 24 Dec<br>2019-26<br>Jan 2020  | 52 critically ill hospitalized patients with laboratory confirmed COVID-19                                                       | Death                                                                                                                                                                                                              | Smoking        | 0.11 (0.01-2.50)                    | N/A      | N/A        | 3.8%               | 0.0%              | 10.0%             | 60                 |

| Table A1 Summary of Studies |                                                                                    |               |                          |                                                              |                                                                                                                                                                                                                                                                                                      |                 |                                     |                     |                                                                                                                                                 |                    |                   |                   |                    |
|-----------------------------|------------------------------------------------------------------------------------|---------------|--------------------------|--------------------------------------------------------------|------------------------------------------------------------------------------------------------------------------------------------------------------------------------------------------------------------------------------------------------------------------------------------------------------|-----------------|-------------------------------------|---------------------|-------------------------------------------------------------------------------------------------------------------------------------------------|--------------------|-------------------|-------------------|--------------------|
| Author                      | Setting                                                                            | Study type    | Time of data collection  | Population                                                   | Definition of disease progression                                                                                                                                                                                                                                                                    | Smoking status  | Odds of disease progression (95%CI) |                     | Adjustment                                                                                                                                      | Smoking prevalence |                   |                   | Patients' mean age |
|                             |                                                                                    |               |                          |                                                              |                                                                                                                                                                                                                                                                                                      |                 | Unadjusted                          | Adjusted            |                                                                                                                                                 | Overall            | More severe group | Less severe group |                    |
| Yao et al [46]              | China Dabieshan Medical Center 19 in Huanggang city, Hubei Province                | Retrospective | 30 Jan 2020-11 Feb 2020  | 108 hospitalized patients with laboratory confirmed COVID-19 | Respiratory distress with respiratory rate $\geq 30$ /min, or breaths per minute, PaO <sub>2</sub> /FIO <sub>2</sub> ratio lower than 250, multilobar infiltrates confusion, or disorientation, or respiratory failure, or required mechanical ventilation, or shock, or organ dysfunction, or death | Current smoker  | 11.18 (1.11-112.83)                 | N/A                 | N/A                                                                                                                                             | 3.7%               | 12.0%             | 1.2%              | 52                 |
| Yu Q et al [47]             | 24 designated hospitals in Jiangsu province                                        | Retrospective | 10 Jan 2020- 18 Feb 2020 | 421 hospitalized patients with laboratory confirmed COVID-19 | Admission to ICU, acute respiratory failure occurrence, or shock                                                                                                                                                                                                                                     | Current smoker  | 0.20 (0.01-3.37)                    | N/A                 | N/A                                                                                                                                             | 3.1%               | 0.0%              | 3.6%              | 47                 |
| Yu T et al [48]             | China Dongguan People's Hospital and Nanfang Hospital, Southern Medical University | Retrospective | Jan 2020-Feb 2020        | 95 hospitalized patients with laboratory confirmed COVID-19  | Pneumonia exacerbation                                                                                                                                                                                                                                                                               | Tobacco smoking | 6.67 (1.11-40.04)                   | 16.13 (1.28-204.16) | Age, sex, blood pressure, BMI, serum lactic acid, neutrophil count, lymphocyte count, hemoglobin, platelet count, creatinine, ALT, AST, and LDH | 7.1%               | 21.1%             | 2.0%              | 43                 |

| Table A1 Summary of Studies |                                           |               |                          |                                                              |                                                                                                                                                                                                                                                       |                         |                                                                                                            |          |            |                                                                   |                                                                          |                                                                       |                    |
|-----------------------------|-------------------------------------------|---------------|--------------------------|--------------------------------------------------------------|-------------------------------------------------------------------------------------------------------------------------------------------------------------------------------------------------------------------------------------------------------|-------------------------|------------------------------------------------------------------------------------------------------------|----------|------------|-------------------------------------------------------------------|--------------------------------------------------------------------------|-----------------------------------------------------------------------|--------------------|
| Author                      | Setting                                   | Study type    | Time of data collection  | Population                                                   | Definition of disease progression                                                                                                                                                                                                                     | Smoking status          | Odds of disease progression (95%CI)                                                                        |          | Adjustment | Smoking prevalence                                                |                                                                          |                                                                       | Patients' mean age |
|                             |                                           |               |                          |                                                              |                                                                                                                                                                                                                                                       |                         | Unadjusted                                                                                                 | Adjusted |            | Overall                                                           | More severe group                                                        | Less severe group                                                     |                    |
| Yu X et al [49]             | Shanghai                                  | Retrospective | 1 Jan 2020- 19 Feb 2020  | 323 hospitalized patients with laboratory confirmed COVID-19 | Severe (dyspnoea, and respiratory rate $\geq$ 30/min, blood oxygen saturation $\leq$ 93%, PaO <sub>2</sub> / FiO <sub>2</sub> ratio $\leq$ 300 mmHg); Critical (respiratory failure, or septic shock, or multiple organ dysfunction/ failure)         | Smoking history         | 0.89 (0.20-4.01)                                                                                           | N/A      | N/A        | 8.1%                                                              | 8.0%                                                                     | 8.9%                                                                  | 50                 |
| Zhang J et al [50]          | China No.7 Hospital of Wuhan              | Retrospective | 16 Jan 2020-3 Feb 2020   | 140 hospitalized patients with laboratory confirmed COVID-19 | Respiratory distress with respiratory rate $\geq$ 30/min, or oxygen saturation $\leq$ 93% at rest, or oxygenation index $\leq$ 300 mmHg                                                                                                               | Current and past smoker | Current smoker: 7.57 (0.35-160.88)<br>Former smoker: 2.03 (0.44-9.42)<br>Current/former: 3.04 (0.73-12.69) | N/A      | N/A        | Current smoker: 1.4%<br>Former smoker: 5%<br>Current/former: 6.4% | Current smoker : 3.4%<br>Former smoker : 6.9%<br>Current /former : 10.3% | Current smoker : 0%<br>Former smoker : 3.7%<br>Current /former : 3.7% | 57                 |
| Zhang R et al [51]          | China Renmin Hospital of Wuhan University | Retrospective | 10 Jan 2020- 10 Feb 2020 | 120 hospitalized patients with laboratory confirmed COVID-19 | Respiratory distress with respiratory rate $\geq$ 30/min, or oxygen saturation $\leq$ 93% at rest, or oxygenation index $\leq$ 300 mmHg, or respiratory failure requiring mechanical ventilation, shock, or organ dysfunction requiring ICU treatment | Current smoking         | 48.02 (2.61-882.27)                                                                                        | N/A      | N/A        | 5.0%                                                              | 20.0%                                                                    | 0.0%                                                                  | 45                 |
| Zhang X et al [52]          | China Zhejiang Province                   | Retrospective | 17 Jan 2020-8 Feb 2020   | 645 patients confirmed with SARSCoV-2 infection              | Abnormal imaging findings (CT scan or Chest X-ray)                                                                                                                                                                                                    | Current smoker          | 1.17 (0.41-3.39)                                                                                           | N/A      | N/A        | 6.4%                                                              | 6.5%                                                                     | 5.6%                                                                  | 47                 |

| Table A1 Summary of Studies |                                                                  |               |                         |                                                              |                                                                                                                                                                                                                                               |                |                                     |          |            |                    |                   |                   |                    |
|-----------------------------|------------------------------------------------------------------|---------------|-------------------------|--------------------------------------------------------------|-----------------------------------------------------------------------------------------------------------------------------------------------------------------------------------------------------------------------------------------------|----------------|-------------------------------------|----------|------------|--------------------|-------------------|-------------------|--------------------|
| Author                      | Setting                                                          | Study type    | Time of data collection | Population                                                   | Definition of disease progression                                                                                                                                                                                                             | Smoking status | Odds of disease progression (95%CI) |          | Adjustment | Smoking prevalence |                   |                   | Patients' mean age |
|                             |                                                                  |               |                         |                                                              |                                                                                                                                                                                                                                               |                | Unadjusted                          | Adjusted |            | Overall            | More severe group | Less severe group |                    |
| Zheng Y et al [53]          | China Taihe Hospital at Shiyan                                   | Retrospective | 16 Jan 2020- 4 Feb 2020 | 73 hospitalized patients with laboratory confirmed COVID-19  | Severe (dyspnoea, and respiratory rate $\geq$ 30/min, blood oxygen saturation $\leq$ 93%, PaO <sub>2</sub> / FiO <sub>2</sub> ratio $\leq$ 300 mmHg); Critical (respiratory failure, or septic shock, or multiple organ dysfunction/ failure) | Smoker         | 0.44 (0.08-2.35)                    | N/A      | N/A        | 11.0%              | 6.7%              | 14.3%             | 43                 |
| Zhou et al [54]             | China Jin Yin-tan Hospital and Wuhan Pulmonary Hospital in Wuhan | Retrospective | 29 Dec 2019-31 Jan 2020 | 191 hospitalized patients with laboratory confirmed COVID-19 | Death                                                                                                                                                                                                                                         | Current smoker | 2.23 (0.65-7.63)                    | N/A      | N/A        | 5.8%               | 4.4%              | 9.3%              | 56                 |

\* Hospitalization status unknown was excluded from the analysis.  
\*\* Two children were excluded from the analysis.  
\*\*\* Increasing oxygen requirement was used in the analysis.

| <b>Table A2 Risk of Bias of Studies (2=high risk, 1=intermediate risk, 0=low risk)</b> |                  |                      |                    |                            |                    |               |
|----------------------------------------------------------------------------------------|------------------|----------------------|--------------------|----------------------------|--------------------|---------------|
| Study                                                                                  | Study population | Exposure measurement | Outcome assessment | Measurement of confounders | Adequate follow-up | Average score |
| Beyrouti et al [8]                                                                     | 2                | 2                    | 0                  | 2                          | 0                  | 1.2           |
| Buckner et al [9]                                                                      | 0                | 2                    | 0                  | 2                          | 0                  | 0.8           |
| CDC COVID-19 [10]                                                                      | 0                | 0                    | 0                  | 2                          | 0                  | 0.4           |
| Chen Q et al [11]                                                                      | 0                | 2                    | 0                  | 2                          | 0                  | 0.8           |
| Chen T et al [12]                                                                      | 0                | 0                    | 0                  | 2                          | 0                  | 0.4           |
| Dong et al [13]                                                                        | 2                | 2                    | 2                  | 2                          | 0                  | 1.6           |
| Feng et al [14]                                                                        | 0                | 2                    | 0                  | 2                          | 0                  | 0.8           |
| Gayam et al [15]                                                                       | 2                | 2                    | 0                  | 2                          | 0                  | 1.2           |
| Giacomelli et al [16]                                                                  | 0                | 2                    | 0                  | 2                          | 0                  | 0.8           |
| Goyal et al [17]                                                                       | 0                | 2                    | 0                  | 2                          | 0                  | 0.8           |
| Guan et al [18]                                                                        | 0                | 0                    | 0                  | 2                          | 0                  | 0.4           |
| Guo et al [19]                                                                         | 0                | 2                    | 0                  | 2                          | 0                  | 0.8           |
| Hu et al [20]                                                                          | 0                | 2                    | 0                  | 0                          | 0                  | 0.4           |
| Huang C et al [21]                                                                     | 1                | 2                    | 0                  | 2                          | 0                  | 1             |
| Huang R et al [22]                                                                     | 0                | 2                    | 0                  | 2                          | 0                  | 0.8           |
| Hur et al [23]                                                                         | 0                | 1                    | 0                  | 2                          | 0                  | 0.6           |
| Ji Dong et al [24]                                                                     | 0                | 2                    | 0                  | 2                          | 0                  | 0.8           |
| Kim et al [25]                                                                         | 1                | 2                    | 0                  | 2                          | 0                  | 1             |
| Klang et al [26]                                                                       | 0                | 2                    | 0                  | 0                          | 0                  | 0.4           |
| Li X et al [27]                                                                        | 0                | 0                    | 0                  | 2                          | 0                  | 0.4           |
| Li YK et al [28]                                                                       | 1                | 2                    | 0                  | 2                          | 0                  | 1             |
| Liang et al [29]                                                                       | 0                | 1                    | 0                  | 2                          | 0                  | 0.6           |
| Liu et al [30]                                                                         | 0                | 2                    | 0                  | 0                          | 0                  | 0.4           |
|                                                                                        |                  |                      |                    |                            |                    |               |
| Mo et al [32]                                                                          | 0                | 2                    | 0                  | 2                          | 0                  | 0.8           |
| Morassi et al [33]                                                                     | 2                | 2                    | 0                  | 2                          | 0                  | 1.2           |
| Palaiodimos et al [34]                                                                 | 0                | 1                    | 0                  | 0                          | 0                  | 0.2           |
| Petrilli et al [35]                                                                    | 0                | 0                    | 0                  | 0                          | 0                  | 0             |
| Qin et al [36]                                                                         | 0                | 2                    | 0                  | 2                          | 0                  | 0.8           |
| Rastrelli et al [37]                                                                   | 1                | 0                    | 0                  | 2                          | 2                  | 1             |
| Ren et al [38]                                                                         | 0                | 2                    | 0                  | 2                          | 0                  | 0.8           |
| Shi et al [39]                                                                         | 0                | 2                    | 0                  | 2                          | 2                  | 1.2           |
| Wan et al [40]                                                                         | 0                | 2                    | 0                  | 2                          | 0                  | 0.8           |
| Wang et al [41]                                                                        | 0                | 2                    | 0                  | 2                          | 0                  | 0.8           |
| Xiong et al [42]                                                                       | 0                | 2                    | 0                  | 2                          | 0                  | 0.8           |
| Xu et al [43]                                                                          | 0                | 2                    | 0                  | 2                          | 0                  | 0.8           |
| Yan et al [44]                                                                         | 0                | 2                    | 0                  | 2                          | 0                  | 0.8           |

| <b>Table A2 Risk of Bias of Studies (2=high risk, 1=intermediate risk, 0=low risk)</b> |                         |                             |                           |                                   |                           |                      |
|----------------------------------------------------------------------------------------|-------------------------|-----------------------------|---------------------------|-----------------------------------|---------------------------|----------------------|
| <b>Study</b>                                                                           | <b>Study population</b> | <b>Exposure measurement</b> | <b>Outcome assessment</b> | <b>Measurement of confounders</b> | <b>Adequate follow-up</b> | <b>Average score</b> |
| Yang et al [45]                                                                        | 0                       | 2                           | 0                         | 2                                 | 0                         | 0.8                  |
| Yao et al [46]                                                                         | 0                       | 2                           | 0                         | 2                                 | 0                         | 0.8                  |
| Yu Q et al [47]                                                                        | 0                       | 2                           | 0                         | 2                                 | 0                         | 0.8                  |
| Yu T et al [48]                                                                        | 0                       | 2                           | 0                         | 0                                 | 2                         | 0.8                  |
| Yu X et al [49]                                                                        | 0                       | 2                           | 0                         | 2                                 | 0                         | 0.8                  |
| Zhang J et al [50]                                                                     | 0                       | 0                           | 0                         | 2                                 | 0                         | 0.4                  |
| Zhang R et al [51]                                                                     | 0                       | 2                           | 0                         | 2                                 | 0                         | 0.8                  |
| Zhang X et al [52]                                                                     | 0                       | 2                           | 0                         | 2                                 | 0                         | 0.8                  |
| Zheng Y et al [53]                                                                     | 0                       | 2                           | 0                         | 2                                 | 0                         | 0.8                  |
| Zhou et al [54]                                                                        | 0                       | 2                           | 0                         | 2                                 | 0                         | 0.8                  |



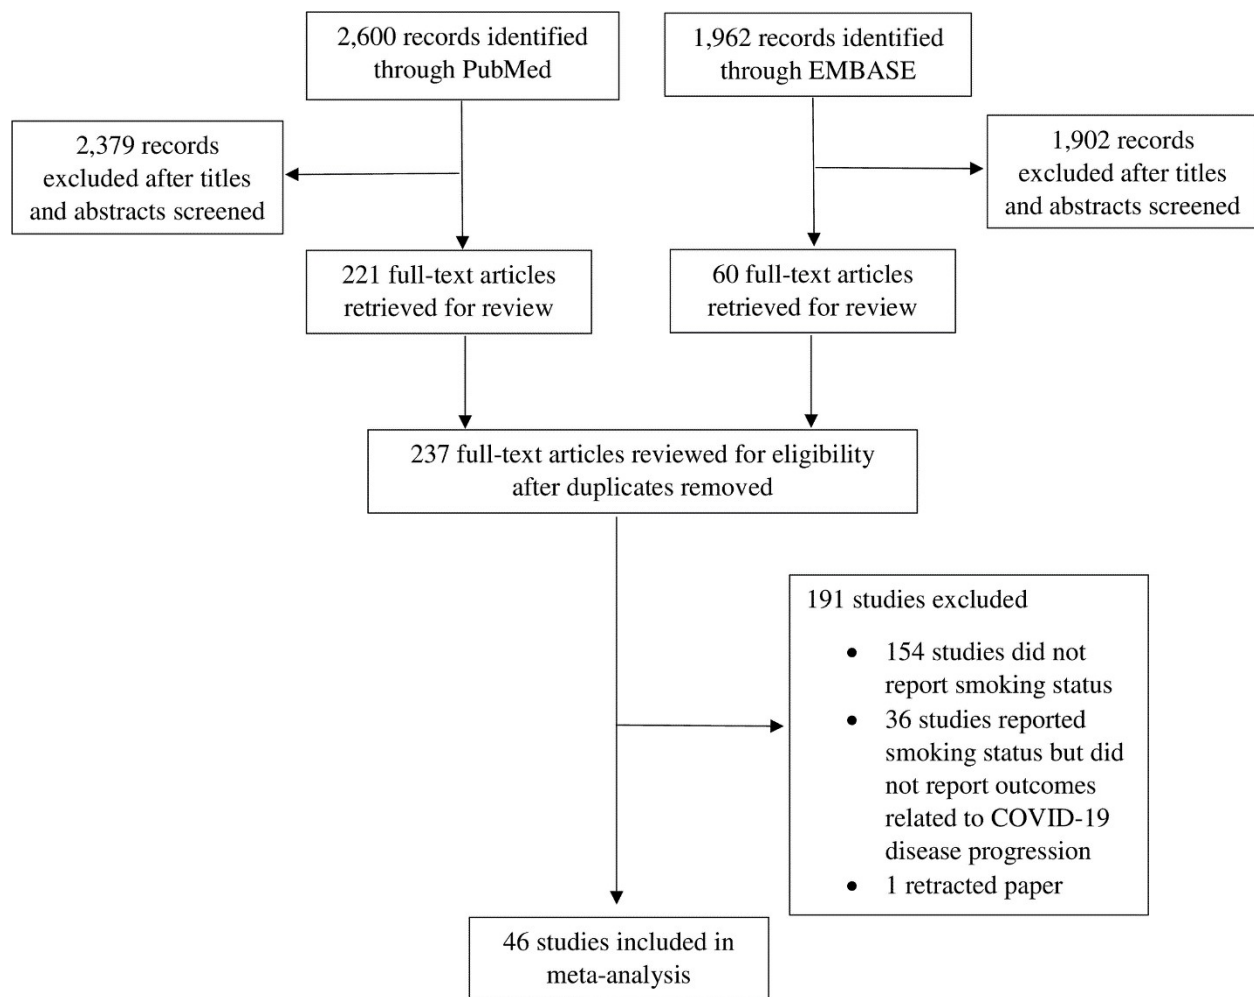

Figure A1. PRISMA diagram

## Ever (current and former) smoking and COVID-19 disease progression (exclude 5 high-risk studies)

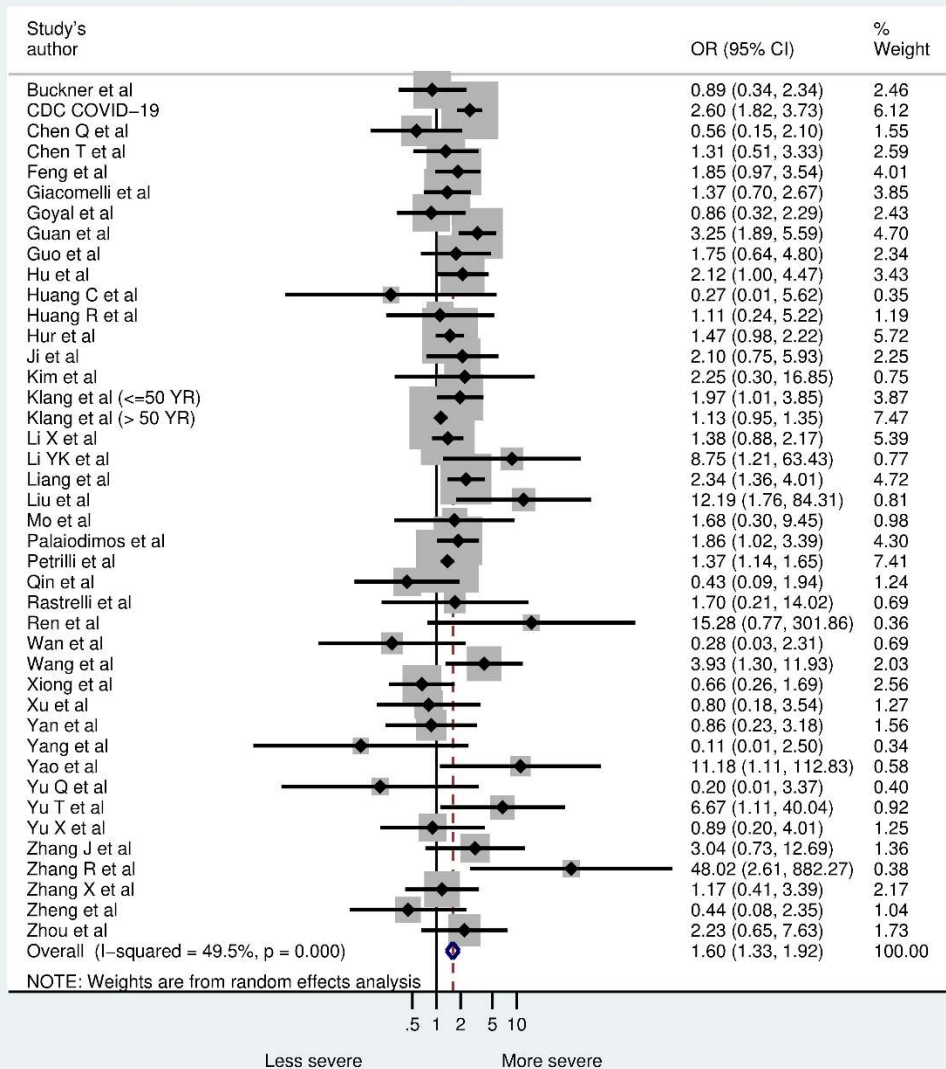

Figure A2. Ever (current and former) smoking and COVID-19 disease progression, dropping 5 studies with high risk of bias scores.

### Ever (current and former) smoking and COVID-19 mortality

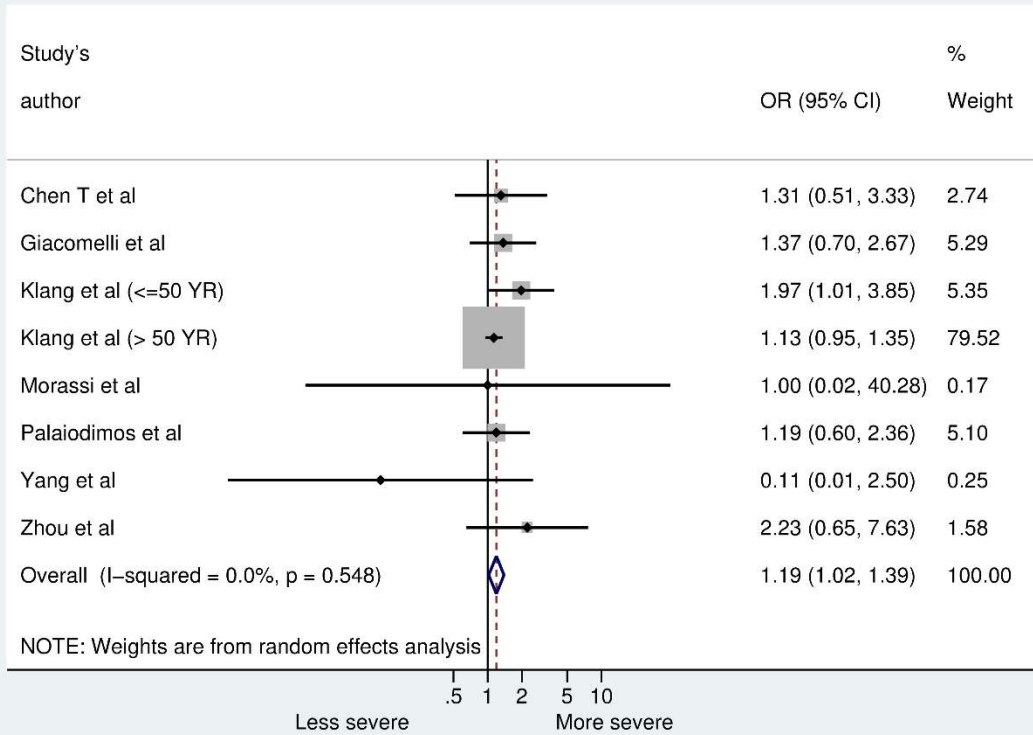

Figure A3. Ever (current and former) smoking and COVID-19 mortality

### Current smoker and COVID-19 disease progression

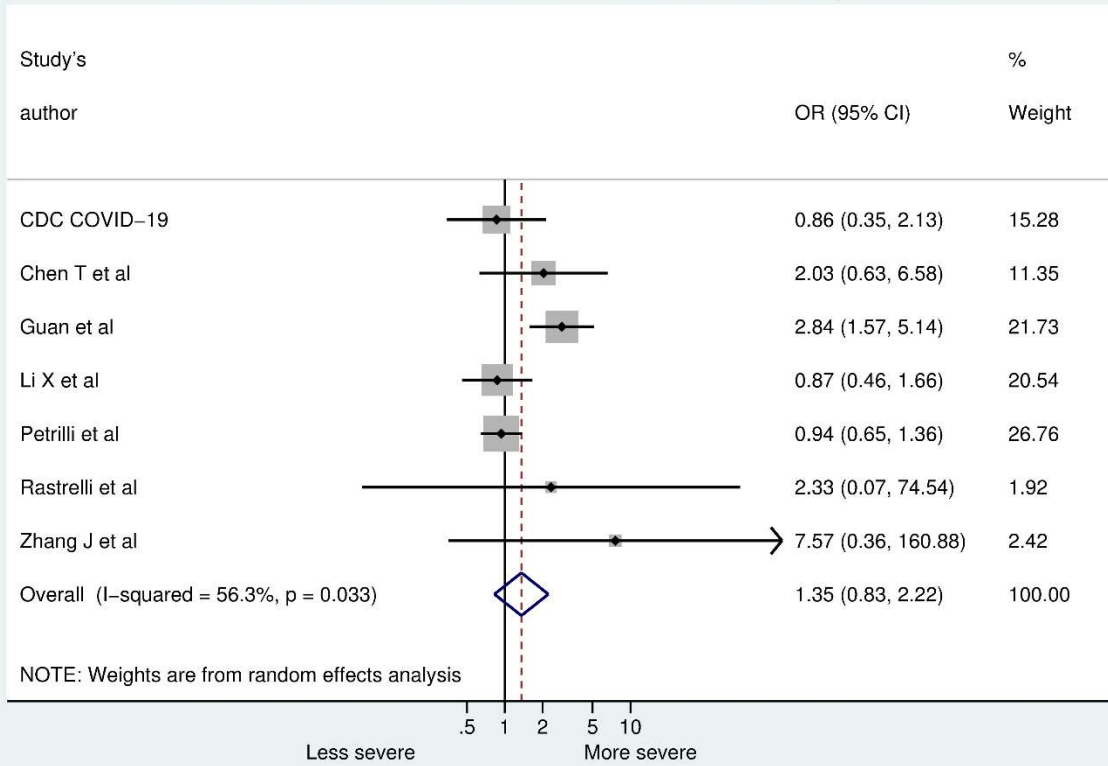

Figure A4. Current smokers vs. never smokers and COVID-19 disease progression.

Ever (current and former) smoking and  
COVID-19 disease progression  
Adjusted ORs

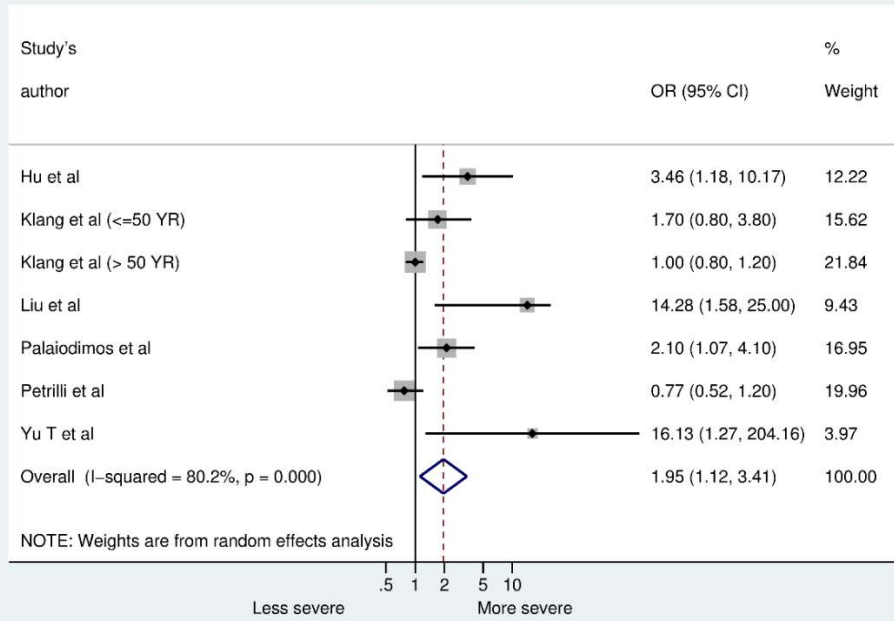

Ever (current and former) smoking and  
COVID-19 disease progression  
Unadjusted ORs

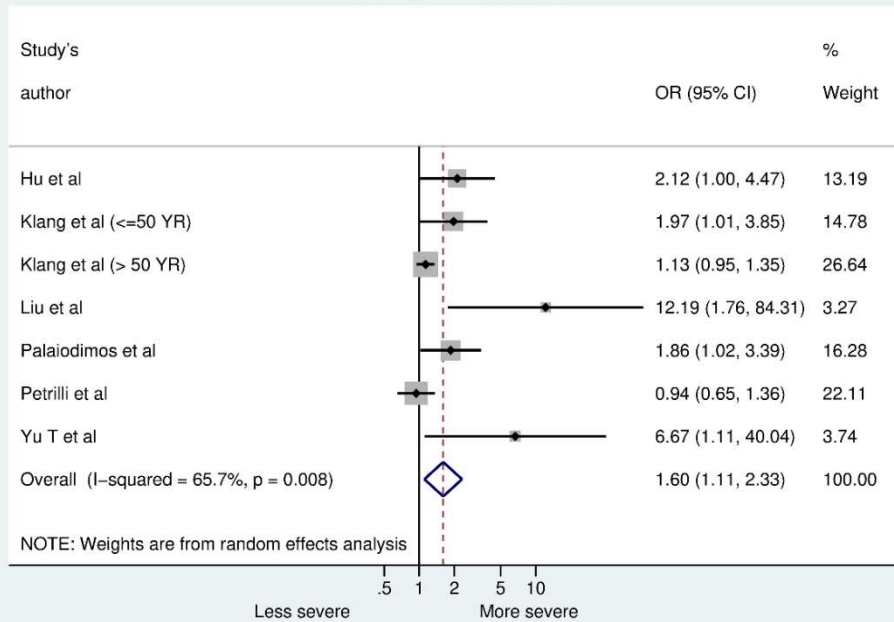

Figure A5. Ever (current and former) smoking and disease progression in models that adjusted (top) and did not adjust (bottom) ORs for confounding variables.
